# Supplementary material for: Assembling gold and platinum nanoparticles on resorcinarene modified graphene and their electrochemical applications
Source: Royal Society of Chemistry journal article supplement (doi:10.1039/c2ta01146h), 2012-12-11
Supplement: c2ta01146h.pdf [file c2ta01146h.pdf]

## Electronic Supplementary Information (ESI)

### Assembling Gold and Platinum Nanoparticles on the Resorcinarene Modified Graphene and Their Electrochemical Applications

Jun Zhou,<sup>a, b</sup> Ming Chen,<sup>a</sup> and Guowang Diao<sup>a, \*</sup>

a College of Chemistry and Chemical Engineering, Yangzhou University, Yangzhou 225002,  
Jiangsu, People's Republic of China

b Nantong Vocational College, Nantong 226001, Jiangsu, People's Republic of China

\* E-mail: gwdiao@yzu.edu.cn

#### 1. Amphiphilic molecular structure of T

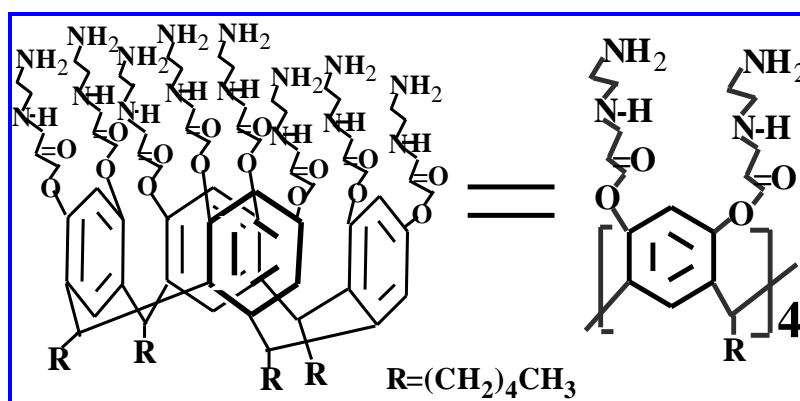

**Fig. S1** Amphiphilic molecular structure of T

#### 2. Photos GN and GN-T

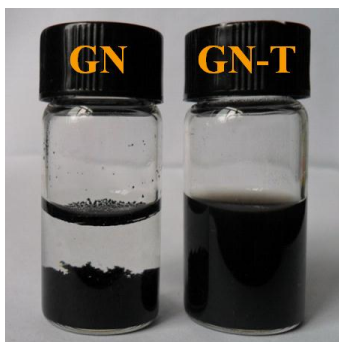

**Fig. S2** Photos GN and GN-T

### 3. TEM images of pre-synthesized PtNPs and AuNPs

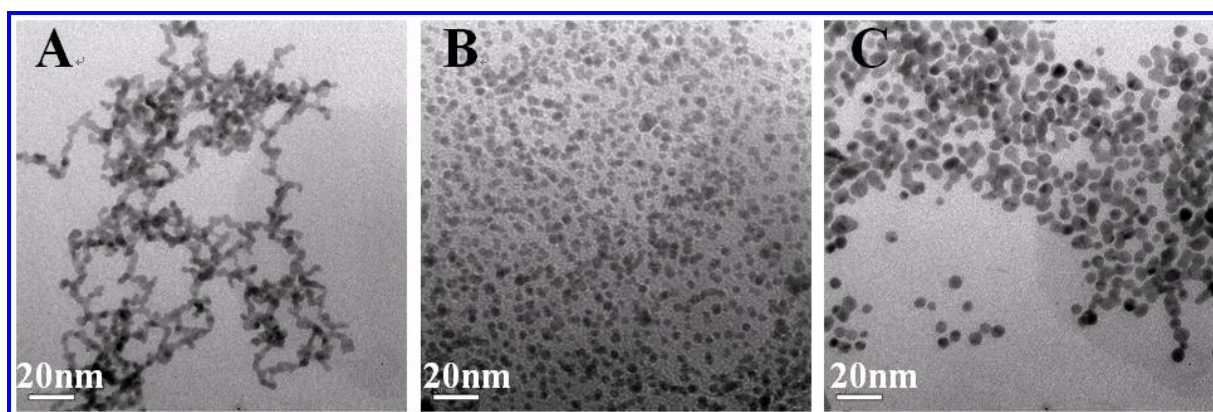

**Fig. S3** TEM images of pre-synthesized PtNPs (A), pre-synthesized AuNPs with 3nm diameter (B), and pre-synthesized AuNPs with 6nm diameter (C).

### 4. TEM images of GN-T-AuNPs that GO and T is just non-covalent bond force and covalent bond force and non-covalent bond force

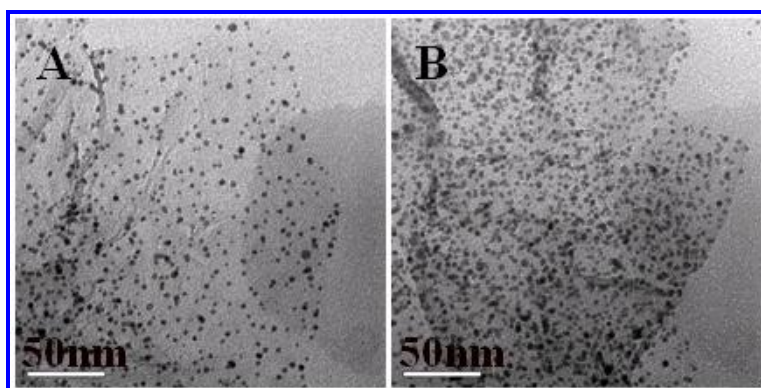

**Fig. S4** (A) TEM images of sparse AuNPs of GN-T-AuNPs that GO and T is just non-covalent bond force. (B) TEM images dense AuNPs of GN-T-AuNPs that GO and T is covalent bond force and non-covalent bond force.
